# Supplementary material
Source: PubMed Central journal article supplement (PMC4664451)
Supplement: NIHMS735328-supplement-supplement_1.pdf [file NIHMS735328-supplement-supplement_1.pdf]

651 Additional File 1. Human Oral Microbial Identification Microarray (HOMIM)  
652 performed by Forsyth Dental Center (Boston, MA, USA) for the clinical visits (v1,v2,v3)  
653 and biofilm model. Data is listed as under de-identified study subject numbers.

654
